# Supplementary material for: Unlocking the catalytic potential of nickel sulfide for sugar electrolysis: green hydrogen generation from kitchen feedstock
Source: Royal Society of Chemistry journal article supplement (doi:10.1039/d3qi01686b), 2023-01-01
Supplement: d3qi01686b1.pdf [file d3qi01686b1.pdf]

## Supporting Information

### **Unlocking the catalytic potential of nickel sulfide for sugar-electrolysis: A green hydrogen generation from kitchen feedstock**

Supriya A.Patil,<sup>a</sup> Atul C. Khot,<sup>b</sup> Kalyani D. Kadam,<sup>c</sup> Hoa Thi Bui<sup>d</sup>, Hyunsik Im,<sup>e</sup> Nabeen K Shrestha <sup>e,\*</sup>

<sup>a</sup> Department of Nanotechnology and Advanced Materials Engineering, Sejong University, Seoul 05006, Republic of Korea

<sup>b</sup> School of Electrical Engineering, Korea University, Seoul 02841, Republic of Korea

<sup>c</sup> Department of Electrical Engineering, Sejong University, Seoul 05006, Republic of Korea

<sup>d</sup> Institute of Materials Science, Vietnam Academy of Science and Technology, Hanoi, Vietnam

<sup>e</sup> Division of Physics and Semiconductor Science, Dongguk University, Seoul 04620, Republic of Korea

Corresponding author: Nabeen K. Shrestha (nabeenkshrestha@dongguk.edu)

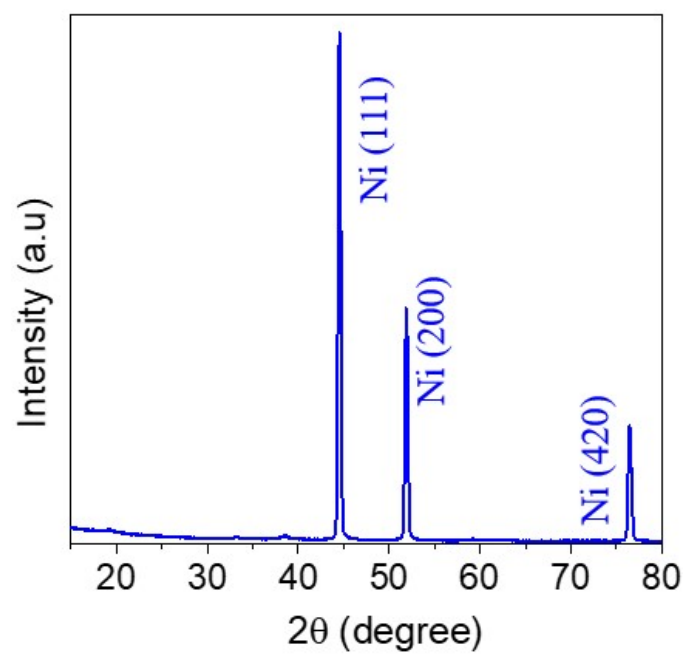

**Figure S1.** XRD pattern of a  $\text{Ni}_7\text{S}_6$  film deposited in a NF-substrate.

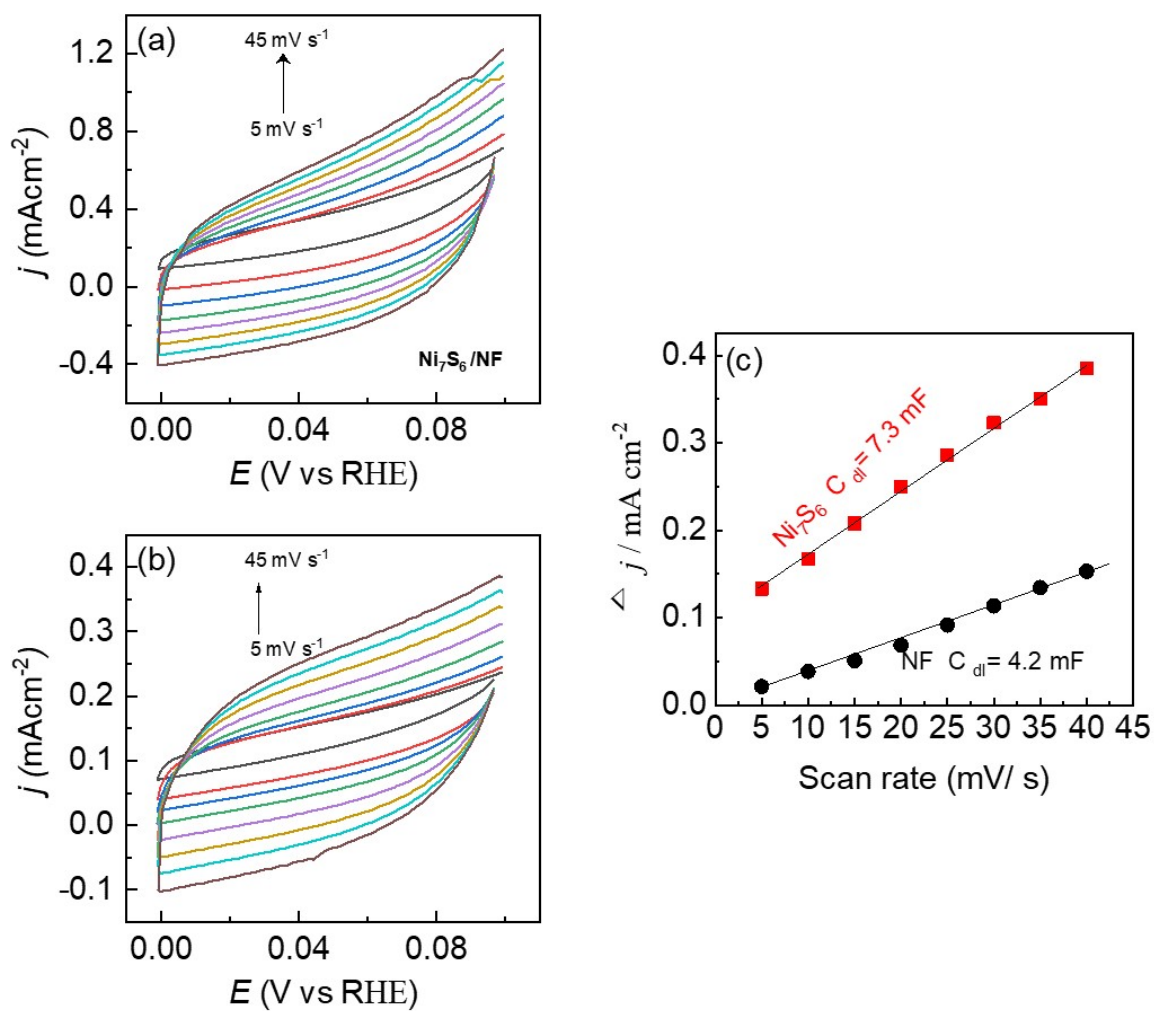

**Figure S2.** (a)-(b) Cyclic voltammetry of Ni<sub>7</sub>S<sub>6</sub>/NF and bare NF electrode at various scan rates. (c) Capacitive current densities vs scan rate plot for electrodes in 0.1 M glucose added 1.0 M KOH solution.

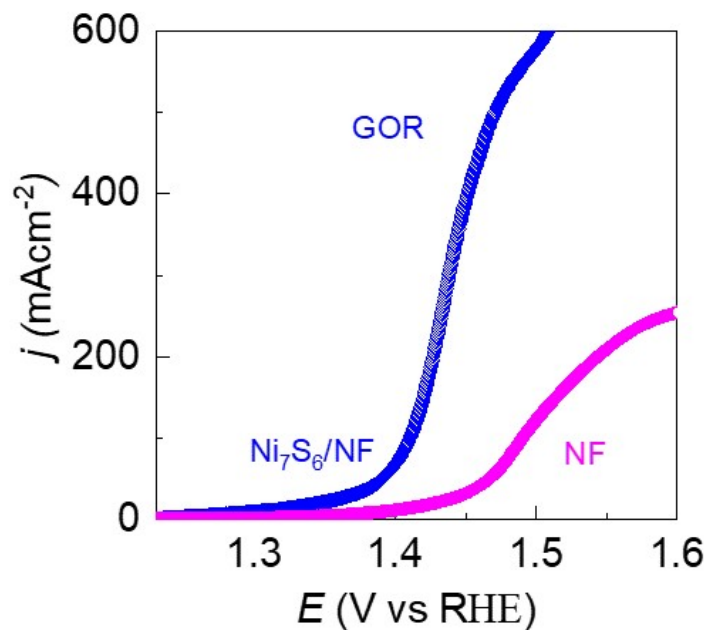

**Figure S3.** GOR LSV of bare NF

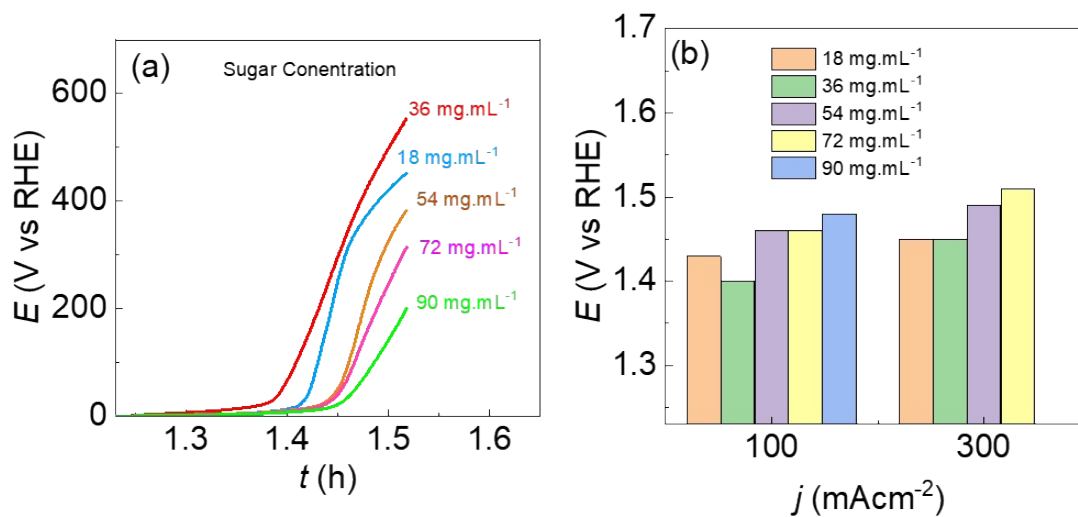

**Figure S4.** (a) SOR with various sugar concentrations\* in 1.0 M KOH solution. (b) Potential vs. SOR current density profile. \* This is concentration based on the weight of the local brand sugar we used in the experiment, not the sucrose concentration.

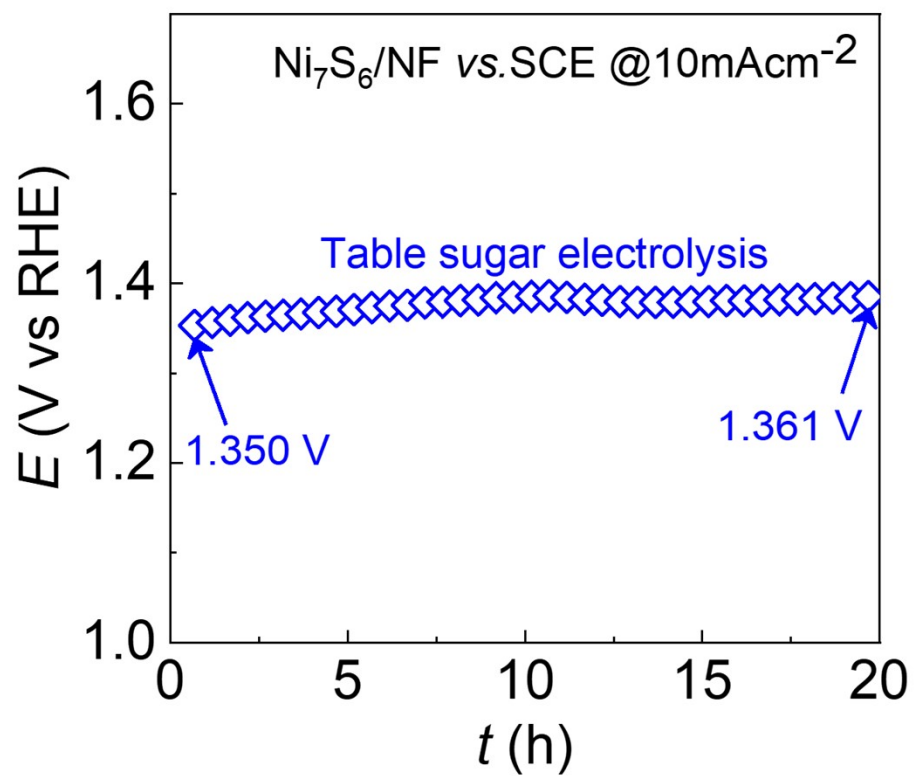

**Figure S5.** Chronopotentiometric response of the Ni<sub>7</sub>S<sub>6</sub>/NF anode during electrolysis of 36 mg.mL<sup>-1</sup> of table-sugar in 1.0 M KOH solution, showing a long-term durability of the catalyst.

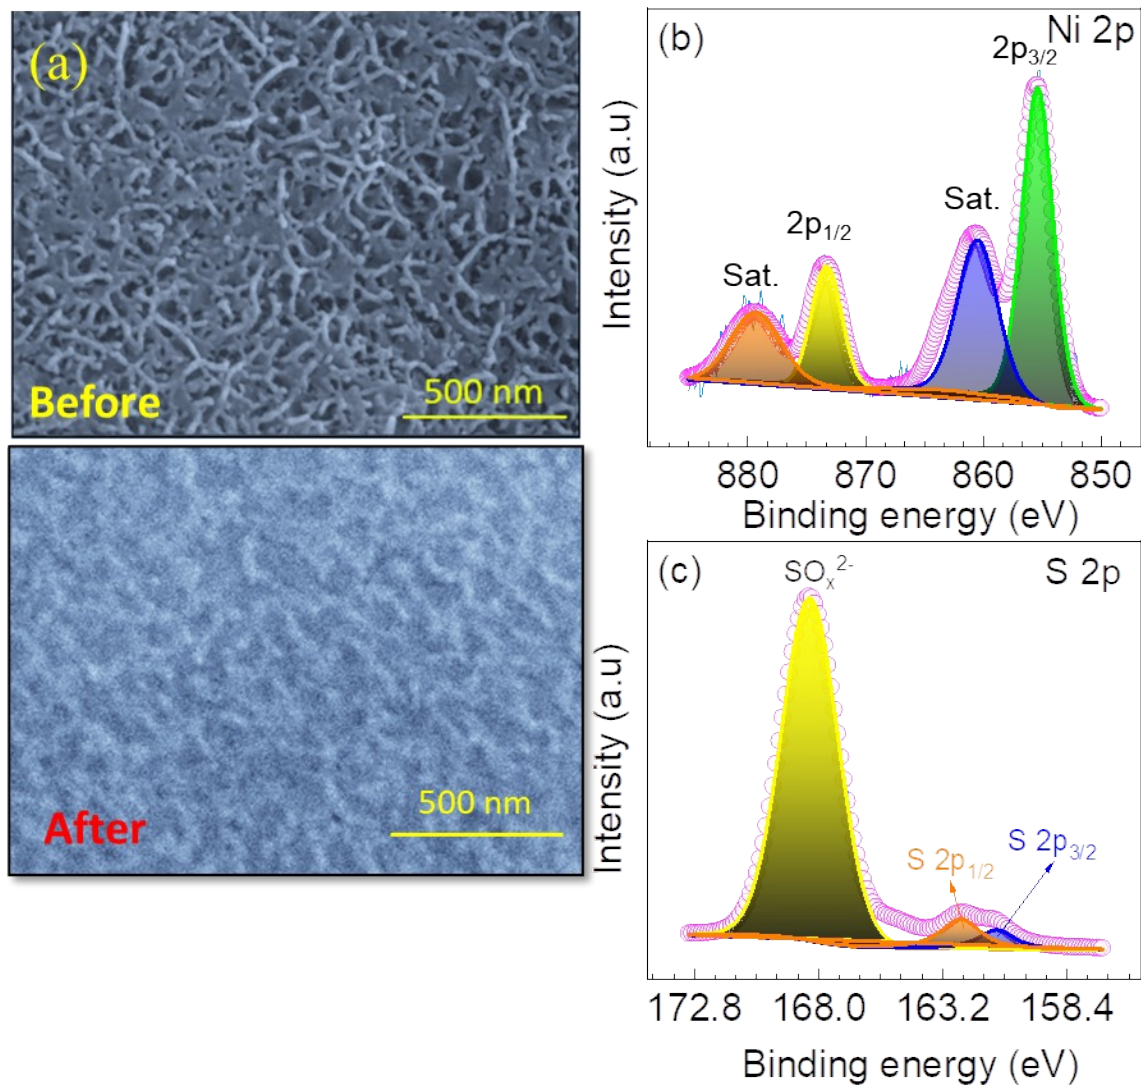

**Figure S6.** Structural, morphological, and activity analysis of  $\text{Ni}_7\text{S}_6/\text{NF}$  electrode after long-term stability test, (a) SEM images, (b)-(c) XPS,

**Table S1.** Literature and comparative analysis of GOR for various electrocatalysts.

| Sr.no | Name                               | Electrolyte                | Current density (mA.cm <sup>-2</sup> ) | GOR potential V vs RHE | Ref.                                          |
|-------|------------------------------------|----------------------------|----------------------------------------|------------------------|-----------------------------------------------|
|       | Ni <sub>7</sub> S <sub>6</sub> /NF | 1M KOH<br>+0.1M<br>Glucose | 10<br>100<br>400                       | 1.30<br>1.41<br>1.45   | This work                                     |
|       | Ni <sub>7</sub> S <sub>6</sub> /NF | Table Sugar                | 10<br>100<br>400                       | 1.34<br>1.41<br>1.48   | This work                                     |
|       | Ni <sub>7</sub> S <sub>6</sub> /NF | Juice                      | 10<br>100<br>200                       | 1.37<br>1.47<br>1.54   | This work                                     |
| 1     | Cu-doped@MIL-88B/NF                | 1M KOH<br>+0.1M<br>Glucose | 10<br>100<br>200                       | 1.35<br>1.42<br>1.46   | <i>Dalton Trans.</i> , 2023, Advance Article  |
| 2     | NiCoSe                             | 1M KOH<br>+0.1M<br>Glucose | 200                                    | 1.32                   | <i>Inorg. Chem.</i> 2023, 62, 26, 10513–10521 |
| 3     | NiFeOx                             | 1M KOH<br>+0.1M<br>Glucose | 10<br>100                              | 1.31<br>1.36           | <i>Nat. Commun.</i> 2020, 11, 265.            |
| 4     | Fe <sub>2</sub> P/SSM              | 1M KOH<br>+0.1M<br>Glucose | 10<br>100                              | 1.35<br>1.40           | <i>Electrochem. Commun.</i> 2017, 83, 11–15   |
| 5     | Co@NPC-800                         | 1M KOH<br>+0.1M<br>Glucose | 10                                     | 1.46                   | <i>Chem. Eng. J.</i> 2022, 430 (1), 132783    |
| 6     | Cu (OH) <sub>2</sub>               | 1M KOH<br>+0.1M<br>Glucose | 100                                    | 1.49                   | <i>Adv. Mater.</i> 2021, 33, 2104791          |
